# Supplementary material
Source: PubMed Central journal article supplement (PMC5291032)
Supplement: supp_pp.16.01443_PP2016-01443R1_Supplemental_Material.pdf [file supp_pp.16.01443_PP2016-01443R1_Supplemental_Material.pdf]

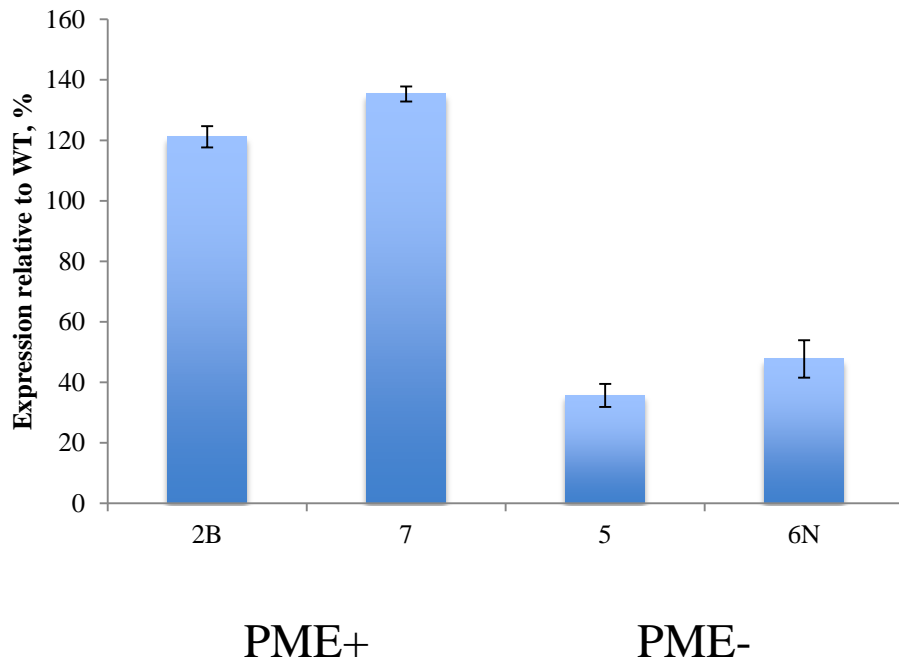

**Supplemental Figure 1.** Quantification of relative levels of *PtxtPME1* transcripts, in relation to the internal calibrator 18S rRNA and to the wild-type, in two independent upregulated lines (PME+) and two independent downregulated lines (PME-). Means of 2 pools of four trees each  $\pm$  SE. RNA was extracted from tissue in the cambial region.
